# Supplementary material for: Phosphate functionalized activated carbon sachet filters for drinking water purification
Source: Royal Society of Chemistry journal article supplement (doi:10.1039/d2ew00623e), 2022-11-15
Supplement: d2ew00623e1.pdf [file d2ew00623e1.pdf]

# Phosphate functionalized activated carbon sachet filters for drinking water purification

Table S1: XPS test parameters for a survey and narrow scan

| Test parameters     | Survey scan | Narrow scan |
|---------------------|-------------|-------------|
| Energy scale        | Binding     | Binding     |
| Pass energy/eV      | 150         | 20          |
| Number of scans     | 4           | 5           |
| Dwell time/ms       | 10          | 50          |
| Lens mode           | standard    | standard    |
| Energy step size/eV | 1           | 0.05        |

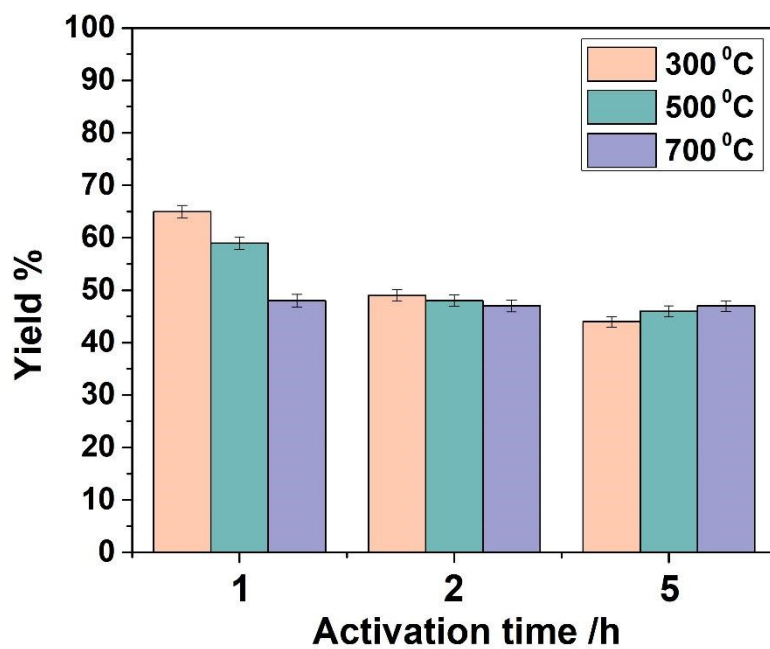

**Figure S1: Percentage yield of FAC synthesized by vapor activation method at different activation time and temperatures**

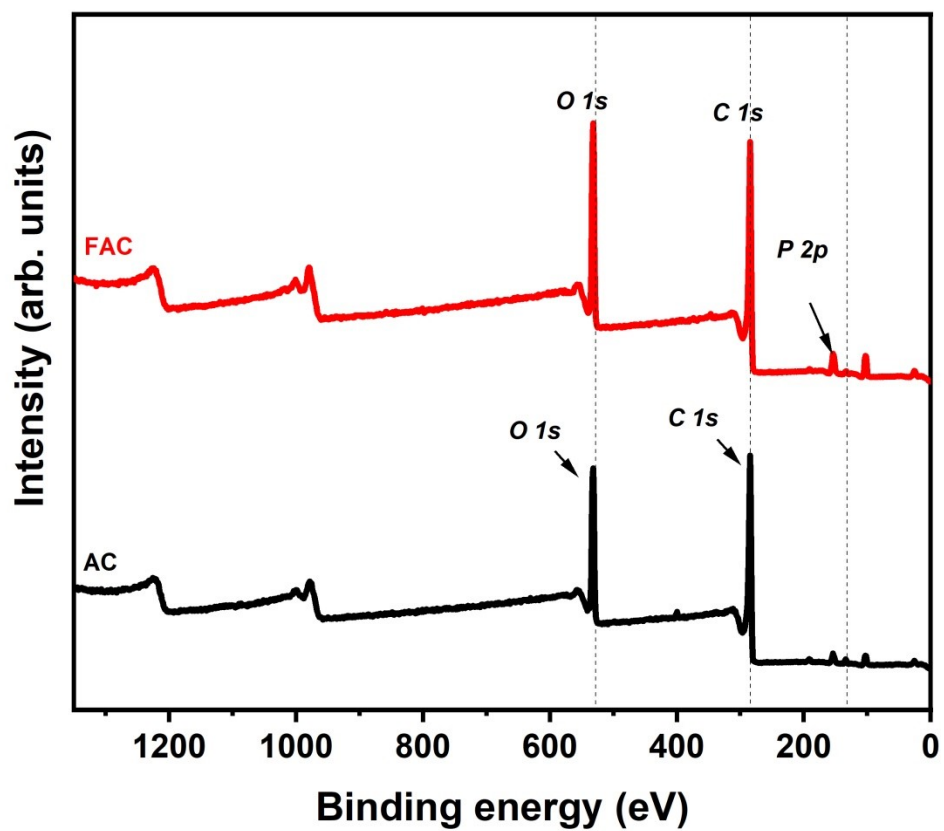

Figure S2: XPS survey spectra of AC and FAC

**Table S2: FTIR functional groups with corresponding wavenumbers**

| Functional Groups                            | Wavenumber/cm <sup>-1</sup> |      |
|----------------------------------------------|-----------------------------|------|
|                                              | AC                          | FAC  |
| O-H stretching vibration                     | 3384                        | 3201 |
| C-H hydroxyl groups<br>asymmetric stretching | 2923, 2860                  | -    |
| C=C vibrations                               | 1593                        | 1575 |
| -C=O stretching vibrations                   | 1700                        | 1752 |
| C-O asymmetric stretching                    | 1240                        | 1195 |
| P-O-P                                        | -                           | 1080 |

**Table S3: XPS quantitative results for AC and FAC**

| Peak | Binding energy (eV) |        | Chemical state                                                               |
|------|---------------------|--------|------------------------------------------------------------------------------|
|      | AC                  | FAC    |                                                                              |
| C 1s | 286.25              | 286.45 | carbon species in alcohol, phenols, ether groups, C-O-P and/or C-O-C linkage |
| C 1s | 284.75              | 284.80 | graphitic sp <sup>2</sup> carbon                                             |
| C 1s | 288.30              | 291.40 | carbon species in carboxylic groups or esters ( C-O-P and/or C-O-C bonds)    |
| O 1s | 531.85              | 533.25 | singly bonded oxygen in C-OH, C-O-C and/or C-O-P groups                      |
| O 1s | 533.40              | 534.80 | non-carbonyl oxygen in carboxylic groups                                     |
| P 2p | -                   | 133.54 | phosphates, pyrophosphates and phosphonates                                  |
| P 2p | -                   | 134.20 | metaphosphates and phenyl-phosphate                                          |

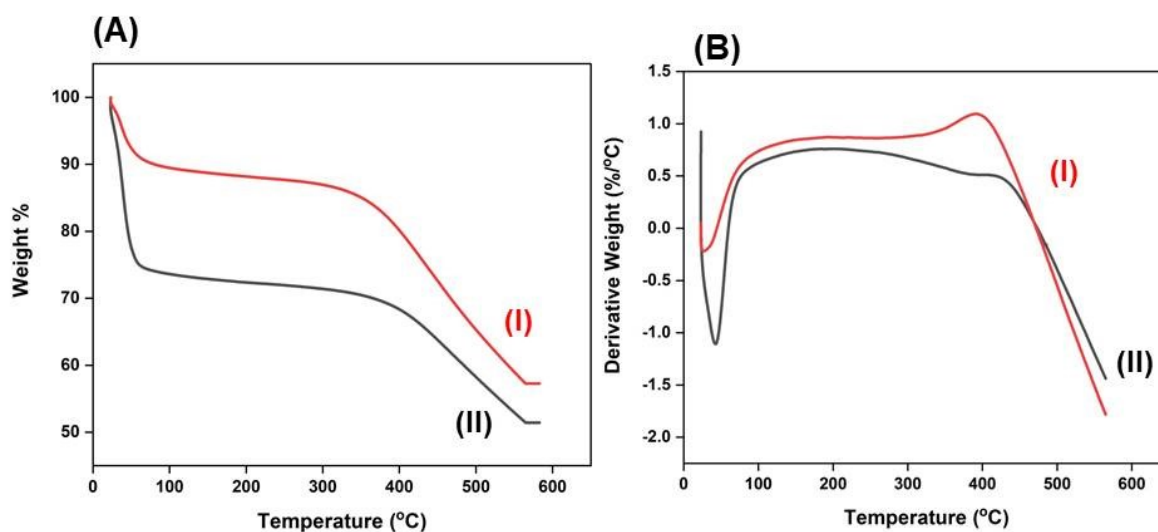

**Figure S3: (A) TGA and (B) DTA curve of (I) FAC and (II) AC**

Weight loss profile of FAC and AC recorded under  $N_2$  environment with a  $10\text{ }^\circ\text{C}/\text{min}$  heating rate from  $50\text{ }^\circ\text{C}$  to  $700\text{ }^\circ\text{C}$  as shown in Figure S4. It can be understood from the graph that three stages of weight loss take place in both activated carbons. The primary weight loss in the range of  $50\text{--}100\text{ }^\circ\text{C}$  is due to moisture weight loss (7.8%). Major decomposition (46.2%) in the second stage between  $100\text{ }^\circ\text{C}$  and  $400\text{ }^\circ\text{C}$  is due to loss of chemically bound water, lignin, cellulose and hemicellulose. On further heating above  $400\text{ }^\circ\text{C}$ , nearly 25% weight loss due to the decomposition of the carbon compounds to volatile gases like CO and  $\text{CO}_2$  was observed. According to DTA curves, as the temperature increases, phosphate groups are converted to several species, such as pyrophosphoric acid ( $\text{H}_4\text{P}_2\text{O}_7$ ) and polyphosphoric acid by condensation and dehydration and eventually  $\text{P}_2\text{O}_5$ . The evaporation of  $\text{P}_2\text{O}_5$  occurs at a temperature between  $400\text{ }^\circ\text{C}$  and  $500\text{ }^\circ\text{C}$ .

**Table S4: Hardness and fluoride removal in selected sample locations after treating with activated carbon synthesized by phosphoric acid soaking method**

| Selected Sample Location | Latitudes and Longitudes | Hardness removal (mg/L) ( $\pm 0.01$ ) |        | Fluoride removal (mg/L) ( $\pm 0.001$ ) |        |
|--------------------------|--------------------------|----------------------------------------|--------|-----------------------------------------|--------|
|                          |                          | Initial                                | Final  | Initial                                 | Final  |
| Ipologama                | 8°06'03.4"N 80°30'35.0"E | 413.5                                  | 269.68 | 0.598                                   | 0.407  |
| Gakulama                 | 8°16'18.5"N 80°29'54.8"E | 446.22                                 | 226.34 | 2.430                                   | 1.5630 |
| Mahailuppallama          | 8°06'10.5"N 80°28'19.0"E | 556.59                                 | 327.57 | 1.590                                   | 0.936  |
| Kiribathwehera           | 8°23'57.1"N 80°23'59.6"E | 327.87                                 | 262.96 | 0.808                                   | 0.542  |
| Galpalama                | 8°23'56.4"N 80°24'21.6"E | 485.13                                 | 269.59 | 1.710                                   | 1.490  |
| Alapathwewa              | 8°23'32.8"N 80°48'14.0"E | 338.82                                 | 241.96 | 1.010                                   | 0.645  |
| Hadagaswewa              | 8°29'42.1"N 80°11'19.9"E | 295.97                                 | 212.64 | 1.390                                   | 1.023  |
| Thuruwila                | 8°13'27.1"N 80°26'21.0"E | 579.33                                 | 249.1  | 1.310                                   | 0.861  |
| Kahatagasdigiliya        | 8°35'12.4"N 80°41'10.4"E | 253.82                                 | 206.06 | 1.480                                   | 0.986  |

**Table S5: XPS spectral results of FAC before and after Calcium, Magnesium and Fluoride ion adsorption**

| Region | Peak position/ eV |        |        |        |
|--------|-------------------|--------|--------|--------|
|        | FAC               | FAC-Ca | FAC-Mg | FAC-F  |
| C 1s   | 286.45            | 284.85 | 286.25 | 284.80 |
| O 1s   | 534.30            | 532.05 | 534.25 | 532.05 |
| P 2p   | 135.65            | 134.05 | 136.25 | 133.55 |

**Table S6: Deconvolution results of XPS spectra of FAC before and after Calcium, Magnesium and Fluoride ion adsorption**

| Region | Peak position/ eV |        |        |        | Assignment                                  |
|--------|-------------------|--------|--------|--------|---------------------------------------------|
|        | FAC               | FAC-Ca | FAC-Mg | FAC-F  |                                             |
| C 1s   | 284.80            | 284.85 | 284.80 | 284.80 | graphite                                    |
|        | 286.45            | 286.3  | 286.30 | 286.45 | R-OH, C-O-P and/or C-O-C                    |
|        | 288.30            | 289.45 | 288.40 | 288.90 | COOH, -C(O)-O-C                             |
|        | 291.40            | -      | 290.55 | -      | $\pi$ - $\pi$ *                             |
| O 1s   | 533.25            | 532.00 | 533.60 | 531.20 | C-OH, C-O-C and/or C-O-P                    |
|        | 534.80            | 533.75 | 535.05 | 533.00 | non-carbonyl oxygen in -COOH                |
| P 2p   | 133.54            | 132.70 | -      | 133.55 | phosphates, pyrophosphates and phosphonates |
|        | 134.20            | 134.05 | 135.95 | 134.70 | metaphosphates and phenyl-phosphate         |
|        | -                 | -      | 136.80 | -      | P <sub>2</sub> O <sub>5</sub>               |



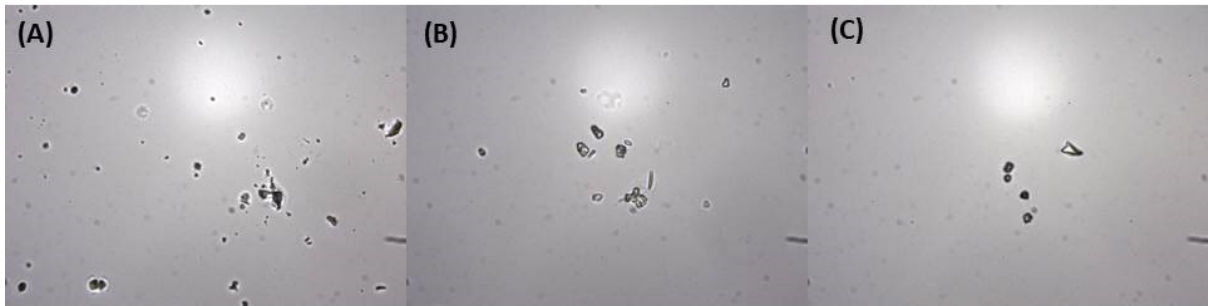

**Figure S4: Light microscopic images of water (A) before treatment of FAC (B) After 20 min (C) After 24 h**

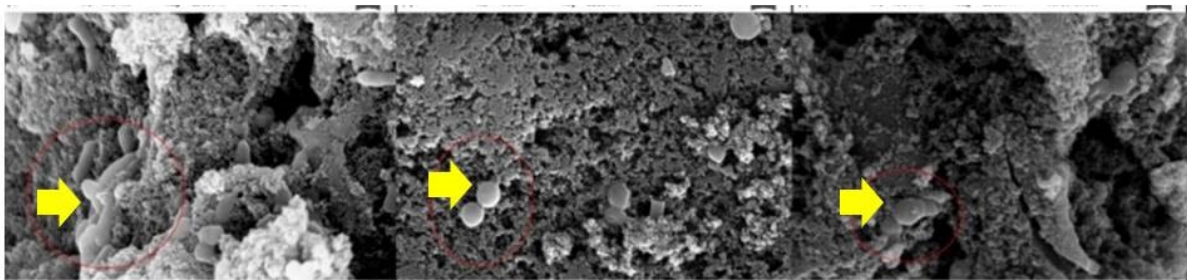

**Figure S5: SEM images of water pathogens after treatment of FAC for 20 min**

**Table S7: Parameters of kinetic models of Calcium, Magnesium and Fluoride adsorption on FAC**

| Initial concentration (mg L <sup>-1</sup> ) | q <sub>e,exp</sub> (mg g <sup>-1</sup> ) | Pseudo-first-order kinetic model         |                                     |                | Pseudo-second-order kinetic model |                                                        |                |
|---------------------------------------------|------------------------------------------|------------------------------------------|-------------------------------------|----------------|-----------------------------------|--------------------------------------------------------|----------------|
|                                             |                                          | q <sub>e,cal</sub> (mg g <sup>-1</sup> ) | K <sub>1</sub> (min <sup>-1</sup> ) | R <sup>2</sup> | q <sub>e,cal</sub> (mg/g)         | K <sub>2</sub> (g mg <sup>-1</sup> min <sup>-1</sup> ) | R <sup>2</sup> |
| Calcium                                     |                                          |                                          |                                     |                |                                   |                                                        |                |
| 50                                          | 7.67                                     | 2.62                                     | 0.0121                              | 0.961          | 8.01                              | 0.002                                                  | 0.998          |
| 100                                         | 25.80                                    | 8.50                                     | 0.0104                              | 0              | 25.90                             | 6                                                      | 3              |
| 250                                         | 2                                        | 13.77                                    | 0.0104                              | 0.960          | 30.03                             | 0.003                                                  | 0.991          |
| 350                                         | 29.85                                    | 15.47                                    | 0.0093                              | 3              | 33.11                             | 2                                                      | 6              |
|                                             |                                          |                                          |                                     | 0.961          |                                   | 0.001                                                  | 0.999          |

|           |       |      |        |       |       |       |       |
|-----------|-------|------|--------|-------|-------|-------|-------|
|           | 32.60 |      |        | 9     |       | 6     | 4     |
|           |       |      |        | 0.918 |       | 0.001 | 0.997 |
|           |       |      |        | 9     |       | 7     | 9     |
| Magnesium |       |      |        |       |       |       |       |
| 50        | 6.25  |      | 0.0094 | 0.963 | 6.37  | 0.002 | 0.997 |
| 100       | 12.47 | 1.11 | 0.0090 | 7     | 12.77 | 6     | 8     |
| 250       | 32.87 | 3.42 | 0.0131 | 0.971 | 32.89 | 0.006 | 0.999 |
| 350       | 40.36 | 9.78 | 0.0090 | 4     | 40.48 | 5     | 3     |
|           |       | 7.09 |        | 0.988 |       | 0.002 | 0.997 |
|           |       |      |        | 6     |       | 7     | 6     |
|           |       |      |        | 0.971 |       | 0.004 | 0.997 |
|           |       |      |        | 7     |       | 1     | 0     |
| Fluoride  |       |      |        |       |       |       |       |
| 1         | 0.11  | 0.05 | 0.0098 | 0.974 | 0.12  | 0.015 | 0.998 |
| 1.5       | 0.16  | 0.08 | 0.0105 | 3     | 0.18  | 6     | 4     |
| 2         | 0.20  | 0.08 | 0.0094 | 0.971 | 0.21  | 0.032 | 0.998 |
| 2.5       | 0.28  | 0.23 | 0.0178 | 3     | 0.27  | 4     | 2     |
|           |       |      |        | 0.962 |       | 0.044 | 0.997 |
|           |       |      |        | 9     |       | 1     | 2     |
|           |       |      |        | 0.964 |       | 0.072 | 0.998 |
|           |       |      |        | 2     |       | 9     | 5     |

**Table S8: Correlation coefficients (R<sup>2</sup>) and constants for the Langmuir and Freundlich isotherms for Calcium, Magnesium and Fluoride adsorption on FAC**

| Adsorbate | Langmuir Isotherm                       |                                         |                | Freundlich isotherm                                                           |      |                |
|-----------|-----------------------------------------|-----------------------------------------|----------------|-------------------------------------------------------------------------------|------|----------------|
|           | Q <sub>o</sub><br>(mg g <sup>-1</sup> ) | K <sub>L</sub><br>(L mg <sup>-1</sup> ) | R <sup>2</sup> | K <sub>F</sub><br>(mg g <sup>-1</sup> (L mg <sup>-1</sup> ) <sup>-1/n</sup> ) | n    | R <sup>2</sup> |
| Calcium   | 48.26                                   | 0.01009                                 | 0.9895         | 1.28416                                                                       | 1.61 | 0.9989         |
| Magnesium | 518.13                                  | 0.00050                                 | 0.9969         | 0.36121                                                                       | 1.11 | 0.9988         |
| Fluoride  | 1.43                                    | 0.17523                                 | 0.9868         | 0.18775                                                                       | 1.47 | 0.9980         |

### Method S1 - Antimicrobial susceptibility testing for FAC and AC

#### ➤ Preparation of standard bacterial cell suspensions

Stock cultures of three test strains, *E. coli* (ATCC 25922), *Salmonella typhi* (ATCC 19430) and *Shigella flexneri* (ATCC 9199) were subcultured on sterile, freshly prepared Brain Heart Infusion (BHI) agar plates and incubated at 37 °C for 24 h to get fresh isolated colonies. Sterile BHI broth (10 mL) was inoculated with few isolated colonies of test strains separately and incubated at 37 °C for another 24 h. The absorbance of resultant 24 h broth cultures was adjusted to 0.5 McFarland turbidity standards to prepare standard cell suspensions with 1.5×10<sup>8</sup> CFU/mL cell density.

#### ➤ Antimicrobial screening

Screening of antimicrobial activity of the FAC was carried out using agar diffusion method against three common water pathogens, *E. coli* (ATCC 25922), *Salmonella typhi* (ATCC 19430) and *Shigella flexneri* (ATCC 9199). Briefly, Mueller-Hinton agar (MHA, OXOID) plates were inoculated with prepared standard cell suspensions using a sterile cotton swab in order to obtain a confluent bacterial growth on agar surface. Then, 1.0 mg of particles (FAC

and AC) was placed on the middle of the plates. These plates were then aerobically incubated at 37 °C for 24 h followed by visual inspection of agar surface for growth inhibition around embedded particles. Bacterial susceptibility to the relevant treatment was indicated by the presence of growth inhibition zone on agar surface (any size).

➤ **Minimum inhibitory concentration (MIC)**

Minimum concentration of FAC required to inhibit the planktonic bacterial population (MIC) was determined using the broth dilution method with few modifications. Briefly, doubling dilutions of nanoparticles were prepared (1.25, 2.5, 5.0, 10.0, 20.0 and 40.0 mg/mL) separately in sterile bijou bottles (1mL/bottle) in sterile BHI broth. Exactly 1 mL of standard cell suspensions of *E. coli*, *Salmonella typhi* and *Shigella flexneri* were added to corresponding bottles and incubated at 37 °C for 24 h. After incubation, bottles were visually observed for the presence or absence of turbidity of the content (bacterial growth). The minimum concentration of the treatment with no turbidity of the content was considered as the MIC point for the relevant treatment.

➤ **Minimum bactericidal concentration (MBC)**

Minimum concentration of treatments required to kill a bacterial population completely was defined as MBC. After visual observation of the bottles as explained in 2.8.1., 10 µL aliquot from each bottle was sub-cultured on sterile BHI agar plate and incubated at 37 °C for 24 h to detect the presence or absence of viable bacteria. Minimum concentration of the treatments with no bacterial growth on agar surface after incubation was considered as MBC.

## Method S2 - Engineering design for activated carbon manufacturing pilot plant using coconut coir dust

As the final step, a pilot plant for activated carbon manufacturing was designed with a production capacity of 5 kg (FAC) per day from ground up. (Figure S6) In this regard, the scaling up of the process of synthesizing FAC is beneficial and straightforward.

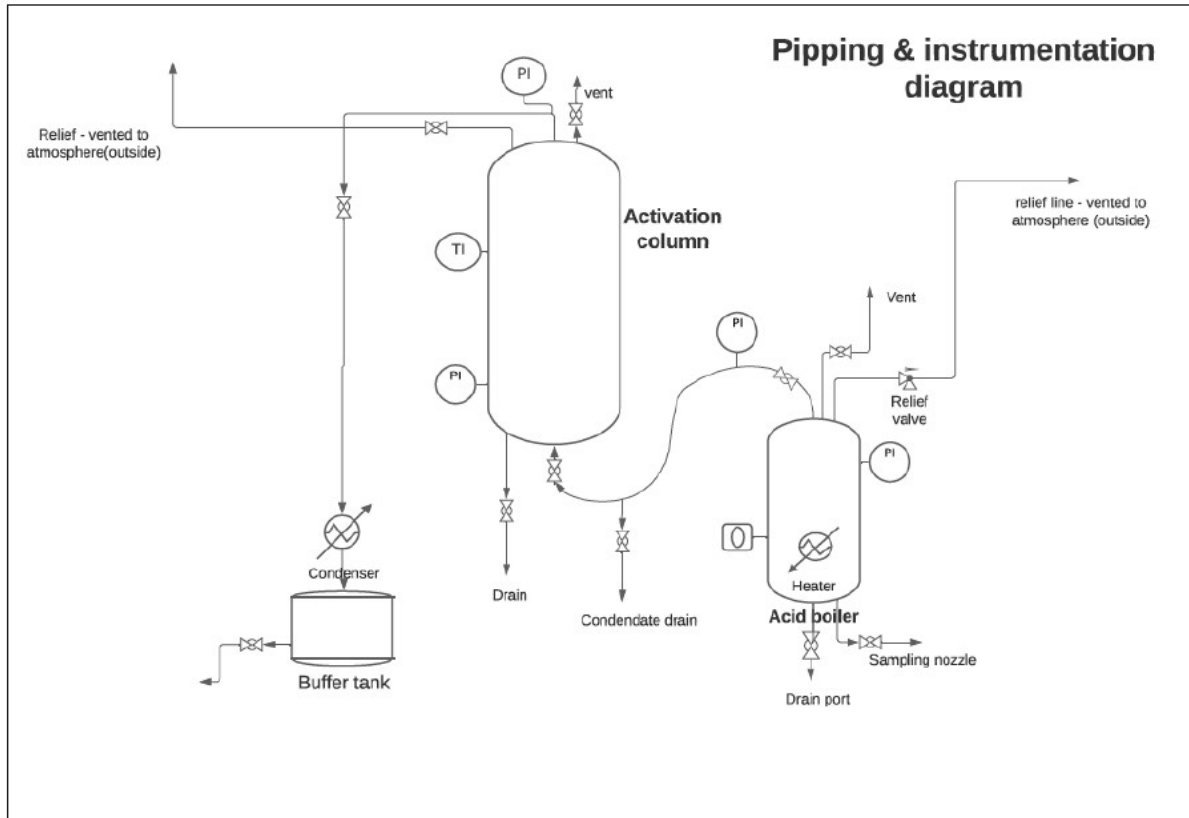

Figure S6: Piping and instrumentation diagram for the scale up design to produce functionalized activated carbon
